# Supplementary material
Source: PubMed Central journal article supplement (PMC3231840)
Supplement: supp_me.2011-1145_me-11-1145_Supplementary_FIle.pdf [file supp_me.2011-1145_me-11-1145_Supplementary_FIle.pdf]

**Supplemental Figures:**

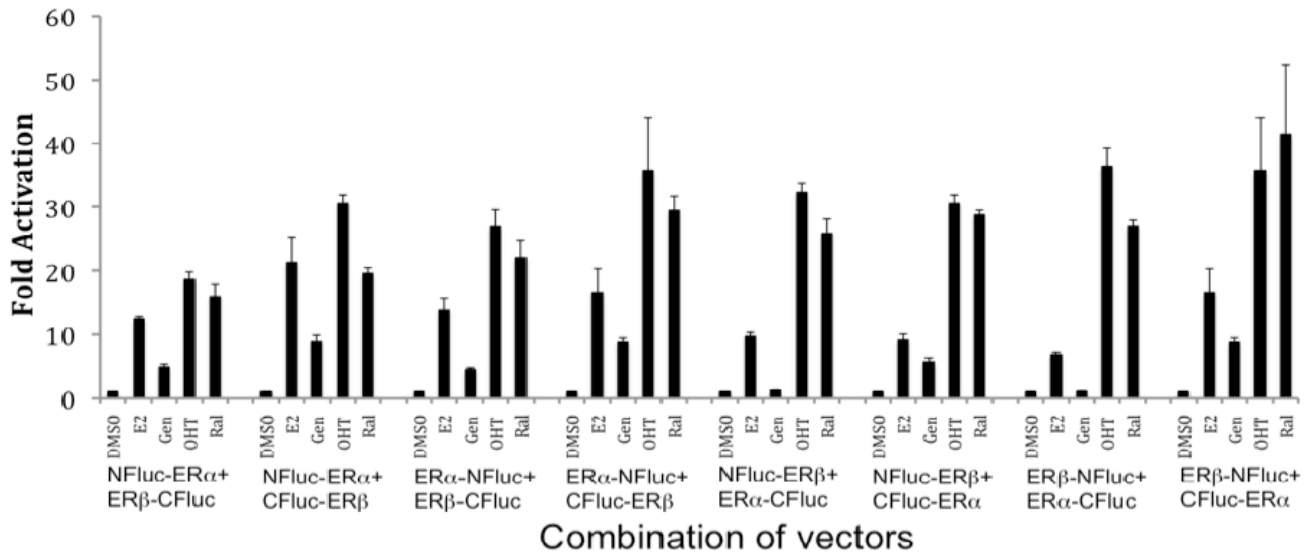

**Supplemental Figure 1.** The ligand induced ER $\alpha$ / $\beta$  heterodimerization studied in HEK293T cells co-transfected with the vectors expressing the fusion proteins in all possible combinations to identify the orientation of ER-LBD with the split luciferase fragments that led to most efficient luciferase complementation. The combination of vectors expressing NFluc-ER $\beta$  and the ER $\alpha$ -CFluc showed a slightly higher level of complementation that can differentiate ligands based on their biocharacters.

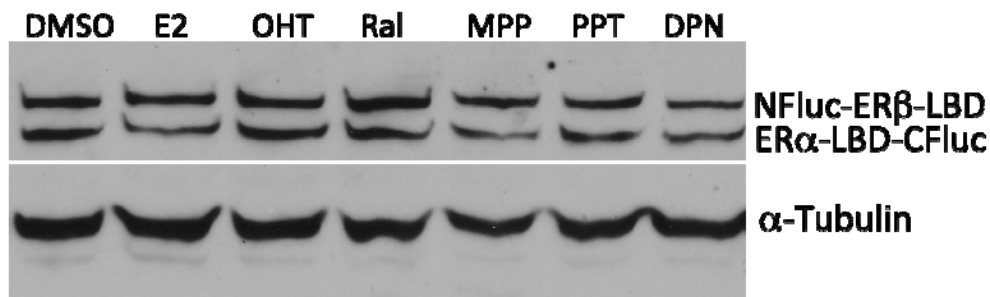

**Supplemental Figure 2.** Western blot analysis of HEK293T cells co-transfected with vectors expressing ER $\alpha$ / $\beta$  heterodimerization system (NFluc-ER $\beta$  and ER $\alpha$ -CFluc)

evaluated for the expression levels of fusion proteins before and after exposure to different ER ligands using anti-Fluc antibody. The results found no variation in the expressed levels of fusion proteins in response to different ligands.
